# Multipoint Pulmonary Vascular Pressure/flow Relationships in Hypoxic and in Normoxic Dogs: Effects of Nitrous Oxide With and Without Cyclooxygenase Inhibition

Philippe Lejeune, M.D.,\* Thierry Deloof, M.D.,† Marc Leeman, M.D.,‡  
Christian Mélot, M.D.,‡ Robert Naeije, M.D., Ph.D.§

The authors investigated the effects of 70% nitrous oxide on overall mean pulmonary artery pressure (MPAP)/cardiac index (CI) relationships in 13 intact pentobarbital anesthetized dogs ventilated alternatively in normoxic (fraction of inspired O<sub>2</sub>, F<sub>I</sub>O<sub>2</sub>, 0.3) and in hypoxic (F<sub>I</sub>O<sub>2</sub>, 0.1) conditions. Five-point MPAP/CI plots were constructed by opening an arterio-venous femoral fistula or by stepwise inflations of a balloon in the inferior vena cava. These MPAP/CI plots were rectilinear in all experimental conditions. Over the entire range of CI studied, 1–5 l·min<sup>-1</sup>·m<sup>-2</sup>, hypoxia increased MPAP in seven dogs ("responders"), and did not affect MPAP in six other dogs ("nonresponders"). Hypoxic pulmonary vasoconstriction (HPV) was restored in "nonresponders" by administration of 1 g acetylsalicylic acid (ASA) intravenously. In "responders," nitrous oxide partially inhibited HPV. In "nonresponders" with a hypoxic pressor response restored by ASA, nitrous oxide enhanced both normoxic and hypoxic pulmonary vascular tone, and did not affect HPV. These results suggest that pulmonary vascular effects of nitrous oxide depend on preexisting pulmonary vascular tone, and may be modulated by cyclooxygenase products of arachidonic acid metabolism. (Key words: Anesthetics, gases: nitrous oxide. Eicosanoids. Lungs: hypoxic pulmonary vasoconstriction. Sympathetic nervous system.)

HYPOXIC PULMONARY VASOCONSTRICTION (HPV) is an intrapulmonary adaptative mechanism which diverts blood away from hypoxic regions of the lung.<sup>1</sup> Inhalational anesthetics are believed to impair this hypoxic regulation of the distribution of pulmonary perfusion and so contribute to the deterioration of pulmonary gas exchange generally seen during anesthesia.<sup>2</sup>

Nitrous oxide has been shown to inhibit HPV in a variety of *in vitro* and *in vivo* non-intact animal preparations.<sup>3-8</sup> It remains, however, unsettled to what extent these observations can be extrapolated to intact animals, including humans. Nitrous oxide has been reported to inhibit unilateral hypoxia-induced pulmonary

blood flow diversion in dogs,<sup>9</sup> and to either augment (in dogs)<sup>10</sup> or to slightly reduce (in newborn lambs)<sup>11</sup> hypoxia-induced increases in pulmonary vascular resistance (PVR).

Calculated PVR as mean pulmonary artery pressure (MPAP) minus pulmonary capillary wedge pressure (PCWP) divided by cardiac output does not, in fact, allow discrimination between active and passive (or flow-dependent) changes in pulmonary arterial pressures.<sup>12-14</sup> The appropriate methodology to evaluate the effects of physiologic and/or pharmacologic interventions on pulmonary vascular tone is to obtain pulmonary arterial pressure measurements at several levels of flow.<sup>12-14</sup>

We, therefore, in the present study, characterized pulmonary arterial pressure/flow relationships in intact pentobarbital-anesthetized dogs to investigate the effects of hypoxia with and without nitrous oxide. We chose this model because pentobarbital does not affect pulmonary hemodynamics.<sup>2,5</sup>

A marked interindividual and interspecies variability is characteristic of HPV.<sup>1</sup> The hypoxic pulmonary pressor response appears to be naturally absent in about 20% of humans,<sup>1</sup> sheep,<sup>15</sup> and also, in our experience, in dogs. Cyclooxygenase inhibition restores HPV in these "nonresponders."<sup>15-17</sup> This is most likely explained by a diversion of arachidonic acid metabolism to its 5-lipoxygenase pathway leading to the generation of vasoconstricting leukotrienes that are no longer opposed by vasodilating prostaglandins.<sup>15-17</sup> Since inhalational anesthetics may stimulate the release of arachidonic acid from cell membranes,<sup>18</sup> we also evaluated the effects of nitrous oxide in dogs with HPV restored after cyclooxygenase inhibition.

## Methods and Materials

Thirteen mongrel dogs (22–35 kg, mean 25) were anesthetized with sodium pentobarbital (30 mg·kg<sup>-1</sup> iv), paralyzed with pancuronium bromide (0.2 mg·kg<sup>-1</sup> iv), and ventilated (Elema® 900 B Servo-ventilator, Siemens Elema, Solna, Sweden) via a cuffed endotracheal tube with inspiratory fraction of O<sub>2</sub> (F<sub>I</sub>O<sub>2</sub>) of 0.3 balance nitrogen, respiratory rate 12·min<sup>-1</sup>, and tidal volume

\* Research fellow (Erasmus Foundation and Therabel Foundation Fellowship).

† Staff Anesthesiologist, Associate Professor.

‡ Staff Intensivist, Assistant Professor.

§ Staff Intensivist, Associate Professor.

Received from the Respiratory Research Unit and the Departments of Intensive Care and Anesthesiology, Erasmus University Hospital, Brussels, Belgium. Accepted for publication August 24, 1987.

Address reprint requests to Dr. Lejeune: Department of Intensive Care, Erasmus University Hospital, 808 route de Lennik, 1070 Brussels, Belgium.

15–20 ml·kg<sup>-1</sup> adjusted to maintain end-expiratory P<sub>CO<sub>2</sub></sub> between 30 to 35 mmHg. Pentobarbital 2 mg·kg<sup>-1</sup> iv and pancuronium 0.2 mg·kg<sup>-1</sup> iv were repeated hourly to maintain anesthesia and prevent spontaneous respiratory efforts. Throughout the experiment, glucose 5% in saline 0.45% was infused 4 ml·kg<sup>-1</sup>·h<sup>-1</sup> via the left external jugular vein. Temperature was maintained at 37–38° C by use of an electric heating pad.

A thermistor-tipped Swan-Ganz® catheter (model 93A-131-7F, Edwards Laboratories, Santa Ana, CA) was inserted via the right external jugular vein and positioned by means of pressure monitoring into a branch of the pulmonary artery, for measurements of pulmonary artery pressure, PCWP, right atrial pressure (RAP), and mixed venous blood sampling. A polyethylene catheter was placed into the abdominal aorta via the right femoral artery for systemic blood pressure measurement and arterial blood sampling. A balloon catheter (Percor® 45 Datascope, Paramus, NJ) was advanced into the inferior vena cava through a right femoral venotomy. Inflation of this balloon produced a titratable decrease in cardiac output by reducing venous return. A large-bore polyethylene cannula was inserted into the left femoral artery and vein to act as an arterio-venous fistula. Opening this fistula resulted in an increase in cardiac output. Thrombus formation along the catheters was prevented by sodium heparin 150 u·kg<sup>-1</sup> iv just before insertion and 50 μ·kg<sup>-1</sup> repeated every 2 h thereafter.

Pulmonary and systemic artery pressures were measured using Bentley transducers and the Heres computer system (ACEC, Charleroi, Belgium) and recorded on a 4-channel Gould recorder (model 2400 S, Gould Inc, Instruments Division, Cleveland, OH). The zero reference was levelled at midchest and vascular pressures were measured at end-expiration. Heart rate (HR) was determined from a continuously monitored electrocardiographic lead. Cardiac output was measured in triplicate by thermodilution using injections of 10 ml of normal saline at 0° C, the 9520-A computer (Edwards Laboratories), and an automated pneumatic pump electronically synchronized on ventilatory cycle. Arterial and mixed venous pH, P<sub>CO<sub>2</sub></sub>, and P<sub>O<sub>2</sub></sub> were measured immediately after drawing the samples by an automated analyzer (ABL-2, Radiometer, Copenhagen, Denmark) and corrected for temperature. End-expiratory P<sub>CO<sub>2</sub></sub> was measured with an infrared capnometer (model 47217, Hewlett Packard®, Palo Alto, CA). Body surface area was calculated as 0.112 × weight (kg)<sup>2/3</sup>, m<sup>2</sup>.

After ensuring steady-state conditions for 20 min at FI<sub>O<sub>2</sub></sub> 0.3 (stable mean systemic arterial pressure (BP), MPAP, HR, and end-tidal P<sub>CO<sub>2</sub></sub>), a five-point MPAP/cardiac index (CI) plot was generated from hemody-

namic determinations at baseline (1 point), after opening the femoral arterio-venous fistula (1 point), and after stepwise incremental inflations of the inferior vena cava balloon catheter with occluded fistula (3 points). The same procedure was repeated after 6 min of an acute hypoxic challenge at FI<sub>O<sub>2</sub></sub> 0.1. The average time to generate a five-point MPAP/CI plot was 25 min.

When hypoxia induced a more than 3-mmHg increase in MPAP at identical CI of 3 l·min<sup>-1</sup>·m<sup>-2</sup> ("responders," n = 7 dogs), nitrous oxide (FI<sub>N<sub>2</sub>O</sub> 0.7) was administered and, after 20 min, a sequence of two five-point MPAP/CI plots, at FI<sub>O<sub>2</sub></sub> 0.3-FI<sub>N<sub>2</sub>O</sub> 0.7 and at FI<sub>O<sub>2</sub></sub> 0.1-FI<sub>N<sub>2</sub>O</sub> 0.7 balance N<sub>2</sub> successively was then repeated.

When hypoxia did not change MPAP by more than 3 mmHg at identical CI of 3 l·min<sup>-1</sup>·m<sup>-2</sup> ("nonresponders," n = 6 dogs), a 1-g iv bolus of acetylsalicylic acid (ASA) was given to restore a hypoxic pressor response.<sup>16</sup> After 45 min, two MPAP/CI plots were constructed as described above successively at FI<sub>O<sub>2</sub></sub> 0.3 and at FI<sub>O<sub>2</sub></sub> 0.1 without nitrous oxide. This sequence of two MPAP/CI plots was then repeated with nitrous oxide (FI<sub>N<sub>2</sub>O</sub> 0.7).

Blood gas measurements were performed during each FI<sub>O<sub>2</sub></sub> at the highest and at the lowest cardiac output, respectively.

Inspection of the individual MPAP/CI plots showed them to be essentially rectilinear and, thus, a least squares regression analysis was used to compute slopes and extrapolated pressure intercepts for each MPAP/CI relationship. To obtain composite MPAP/CI plots for each experimental situation, MPAP interpolated from the regression analysis from individual dogs were averaged at 1 l·min<sup>-1</sup>·m<sup>-2</sup> intervals of CI from 1 to 5 l·min<sup>-1</sup>·m<sup>2</sup>, and presented as mean ± SEM. A two-factor analysis of variance for repeated measures was used to assess 1° the effects of hypoxia and of drugs on hemodynamics and on blood gases at the highest and at the lowest CI; 2° the effects of hypoxia and of drugs on MPAP at CI levels from 1 to 5 l·min<sup>-1</sup>·m<sup>-2</sup>. If the F-ratio of the analysis of variance reached a P < 0.05 level, paired Student's *t* tests were performed to compare two specific situations.<sup>19</sup>

## Results

### MANIPULATION OF CARDIAC OUTPUT

Cardiac index was manipulated between values around 1 to 5 l·min<sup>-1</sup>·m<sup>-2</sup> (tables 1, 2). The BP/CI relationships were non-linear. The MPAP/CI relationships were linear in all experimental conditions with correlation coefficients ranging from 0.95 to 0.99. Blood gases mainly changed by a decrease in mixed venous P<sub>O<sub>2</sub></sub> at the lowest CI (tables 3, 4).

TABLE 1. Hemodynamics in Seven Dogs ("Responders") Given Nitrous Oxide in Normoxic and in Hypoxic Conditions

|                                               | FIO <sub>2</sub> 0.3  |                    | FIO <sub>2</sub> 0.1  |                    |
|-----------------------------------------------|-----------------------|--------------------|-----------------------|--------------------|
|                                               | Without Nitrous Oxide | With Nitrous Oxide | Without Nitrous Oxide | With Nitrous Oxide |
| CI (l · min <sup>-1</sup> · m <sup>-2</sup> ) |                       |                    |                       |                    |
| Highest CI                                    | 4.40 ± 0.40           | 4.16 ± 0.50        | 4.28 ± 0.46           | 5.86 ± 0.45*       |
| Lowest CI                                     | 1.08 ± 0.13           | 1.27 ± 0.16        | 1.45 ± 0.22           | 1.39 ± 0.10        |
| HR (beats · min <sup>-1</sup> )               |                       |                    |                       |                    |
| Highest CI                                    | 168 ± 6               | 149 ± 4            | 157 ± 7*              | 173 ± 4*           |
| Lowest CI                                     | 174 ± 12              | 182 ± 11           | 152 ± 6*              | 178 ± 9*           |
| BP (mmHg)                                     |                       |                    |                       |                    |
| Highest CI                                    | 128 ± 6               | 124 ± 5            | 145 ± 8               | 150 ± 12           |
| Lowest CI                                     | 87 ± 6                | 95 ± 8             | 74 ± 4                | 89 ± 9             |
| MPAP (mmHg)                                   |                       |                    |                       |                    |
| Highest CI                                    | 17 ± 2                | 17 ± 1             | 24 ± 2*               | 28 ± 2*            |
| Lowest CI                                     | 8 ± 1                 | 9 ± 1              | 11 ± 1*               | 12 ± 1*            |
| PCWP (mmHg)                                   |                       |                    |                       |                    |
| Highest CI                                    | 5 ± 1                 | 8 ± 1*             | 7 ± 1                 | 8 ± 1              |
| Lowest CI                                     | 2 ± 1                 | 2 ± 1              | 2 ± 1                 | 2 ± 1              |
| RAP (mmHg)                                    |                       |                    |                       |                    |
| Highest CI                                    | 3 ± 1                 | 5 ± 1*             | 4 ± 1                 | 5 ± 1              |
| Lowest CI                                     | 1 ± 1                 | 2 ± 1              | 2 ± 1                 | 2 ± 1              |

Values are expressed as mean ± SEM. Second and third columns are compared to the first. Fourth column is compared to the third.

\* Significance of changes ( $P < 0.05$ ).

### HYPOXIA

Hypoxia markedly decreased arterial and mixed venous P<sub>O<sub>2</sub></sub> with no changes in arterial pH and P<sub>CO<sub>2</sub></sub> (tables 3, 4). The only hemodynamic changes were an

increase in MPAP and a slight decrease in HR in the "responder" dogs (table 1). Over the entire range of CI studied, MPAP was increased in the seven "responder" dogs and unaffected in the six "nonresponder" dogs (figs. 1, 2).

TABLE 2. Hemodynamics in Six Dogs ("Nonresponders") Given Successively Acetylsalicylic Acid and Nitrous Oxide in Normoxic and in Hypoxic Conditions

|                                               | FIO <sub>2</sub> 0.3  |                           |                    | FIO <sub>2</sub> 0.1  |                           |                    |
|-----------------------------------------------|-----------------------|---------------------------|--------------------|-----------------------|---------------------------|--------------------|
|                                               | Without Nitrous Oxide | With Acetylsalicylic Acid | With Nitrous Oxide | Without Nitrous Oxide | With Acetylsalicylic Acid | With Nitrous Oxide |
| CI (l · min <sup>-1</sup> · m <sup>-2</sup> ) |                       |                           |                    |                       |                           |                    |
| Highest CI                                    | 3.79 ± 0.37           | 4.26 ± 0.37               | 3.27 ± 0.22*       | 4.24 ± 0.25           | 4.57 ± 0.25               | 4.19 ± 0.20        |
| Lowest CI                                     | 0.97 ± 0.10           | 1.18 ± 0.14               | 0.98 ± 0.07        | 1.24 ± 0.13           | 1.28 ± 0.11               | 0.95 ± 0.08        |
| HR (beats · min <sup>-1</sup> )               |                       |                           |                    |                       |                           |                    |
| Highest CI                                    | 161 ± 14              | 152 ± 9                   | 138 ± 8            | 156 ± 13              | 155 ± 8                   | 161 ± 9            |
| Lowest CI                                     | 141 ± 7               | 158 ± 1                   | 165 ± 12           | 141 ± 6               | 148 ± 11                  | 155 ± 9            |
| BP (mmHg)                                     |                       |                           |                    |                       |                           |                    |
| Highest CI                                    | 123 ± 5               | 125 ± 4                   | 132 ± 4*           | 126 ± 5               | 142 ± 6*                  | 147 ± 7            |
| Lowest CI                                     | 62 ± 4                | 83 ± 11                   | 95 ± 8             | 62 ± 4                | 75 ± 10                   | 75 ± 6             |
| MPAP (mmHg)                                   |                       |                           |                    |                       |                           |                    |
| Highest CI                                    | 15 ± 1                | 18 ± 1                    | 18 ± 1             | 17 ± 2                | 28 ± 2*                   | 30 ± 3             |
| Lowest CI                                     | 7 ± 1                 | 8 ± 1                     | 8 ± 1              | 9 ± 1                 | 12 ± 1*                   | 12 ± 2             |
| PCWP (mmHg)                                   |                       |                           |                    |                       |                           |                    |
| Highest CI                                    | 6 ± 1                 | 7 ± 1                     | 9 ± 1              | 7 ± 1                 | 7 ± 1                     | 8 ± 1              |
| Lowest CI                                     | 4 ± 1                 | 3 ± 1                     | 3 ± 1              | 3 ± 1                 | 3 ± 1                     | 4 ± 1              |
| RAP (mmHg)                                    |                       |                           |                    |                       |                           |                    |
| Highest CI                                    | 4 ± 1                 | 4 ± 1                     | 5 ± 1              | 4 ± 1                 | 4 ± 1                     | 5 ± 1              |
| Lowest CI                                     | 2 ± 1                 | 2 ± 1                     | 1 ± 1              | 2 ± 1                 | 2 ± 1                     | 2 ± 1              |

Values are expressed as mean ± SEM. Second and fourth columns are compared to the first. Third column is compared to the second. Fifth column is compared to the fourth. Sixth column is compared to

the fifth.

\* Significance of changes ( $P < 0.05$ ).

TABLE 3. Blood Gases in Seven Dogs ("Responders") Given Nitrous Oxide in Normoxic and in Hypoxic Conditions

|                          | F <sub>I</sub> O <sub>2</sub> 0.3 |                    | F <sub>I</sub> O <sub>2</sub> 0.1 |                    |
|--------------------------|-----------------------------------|--------------------|-----------------------------------|--------------------|
|                          | Without Nitrous Oxide             | With Nitrous Oxide | Without Nitrous Oxide             | With Nitrous Oxide |
| pH <sub>a</sub>          |                                   |                    |                                   |                    |
| Highest CI               | 7.35 ± 0.02                       | 7.30 ± 0.02*       | 7.36 ± 0.02                       | 7.31 ± 0.02*       |
| Lowest CI                | 7.38 ± 0.02                       | 7.31 ± 0.01*       | 7.35 ± 0.02                       | 7.30 ± 0.02*       |
| PaO <sub>2</sub> (mmHg)  |                                   |                    |                                   |                    |
| Highest CI               | 130 ± 8                           | 142 ± 8            | 35 ± 1*                           | 33 ± 1             |
| Lowest CI                | 138 ± 9                           | 135 ± 10           | 41 ± 1*                           | 39 ± 1             |
| PaCO <sub>2</sub> (mmHg) |                                   |                    |                                   |                    |
| Highest CI               | 36 ± 1                            | 35 ± 1             | 33 ± 1*                           | 36 ± 1*            |
| Lowest CI                | 29 ± 1                            | 32 ± 1             | 29 ± 1                            | 32 ± 2*            |
| PvO <sub>2</sub> (mmHg)  |                                   |                    |                                   |                    |
| Highest CI               | 56 ± 2                            | 60 ± 2*            | 27 ± 2*                           | 26 ± 2             |
| Lowest CI                | 34 ± 2                            | 39 ± 2*            | 23 ± 1*                           | 22 ± 2             |

Values are expressed as mean ± SEM. Second and third columns are compared to the first. Fourth column is compared to the third.

\* Significance of changes ( $P < 0.05$ ).

#### CYCLOOXYGENASE INHIBITION BY ASA

Administration of ASA 1 g iv to the "nonresponders" had no effect at F<sub>I</sub>O<sub>2</sub> 0.3, but increased MPAP and BP (the latter at the highest CI only) at F<sub>I</sub>O<sub>2</sub> 0.1 (tables 2, 4). A pulmonary pressor response was restored by ASA over the entire range of CI studied (fig. 2).

#### NITROUS OXIDE

In the "responders," the main changes after nitrous oxide were a reduction of arterial pH at both F<sub>I</sub>O<sub>2</sub> 0.1 and 0.3, an increase of PCWP and in RAP (at the highest CI), and an increase of the highest CI, HR, and

MPAP at F<sub>I</sub>O<sub>2</sub> 0.1 (tables 1, 3). Nitrous oxide did not affect pulmonary vascular tone in normoxia, as well as in hypoxia (fig. 1). The hypoxic pressor response, however, was partially inhibited when expressed as MPAP at F<sub>I</sub>O<sub>2</sub> 0.1 minus MPAP at F<sub>I</sub>O<sub>2</sub> 0.3 at a given CI (fig. 3).

In the "nonresponders" after ASA administration, nitrous oxide reduced the highest CI and increased BP (at the highest CI) in normoxia, but had no effect during hypoxia (tables 2, 4). After nitrous oxide, MPAP increased at the highest CI (from 2 to 5 l · min<sup>-1</sup> · m<sup>-2</sup>) during normoxia, as well as during hypoxia (fig. 4). The hypoxic pressor response on the other hand was unaffected (fig. 3).

TABLE 4. Blood Gases in Six Dogs ("Nonresponders") Given Successively Acetylsalicylic Acid and Nitrous Oxide in Normoxic and in Hypoxic Conditions

|                          | F <sub>I</sub> O <sub>2</sub> 0.3 |                           |                    | F <sub>I</sub> O <sub>2</sub> 0.1 |                           |                    |
|--------------------------|-----------------------------------|---------------------------|--------------------|-----------------------------------|---------------------------|--------------------|
|                          | Without Nitrous Oxide             | With Acetylsalicylic Acid | With Nitrous Oxide | Without Nitrous Oxide             | With Acetylsalicylic Acid | With Nitrous Oxide |
| pH <sub>a</sub>          |                                   |                           |                    |                                   |                           |                    |
| Highest CI               | 7.37 ± 0.01                       | 7.34 ± 0.01               | 7.32 ± 0.01        | 7.36 ± 0.01                       | 7.36 ± 0.01               | 7.34 ± 0.01        |
| Lowest CI                | 7.36 ± 0.01                       | 7.40 ± 0.02               | 7.36 ± 0.02        | 7.36 ± 0.01                       | 7.35 ± 0.01               | 7.34 ± 0.02        |
| PaO <sub>2</sub> (mmHg)  |                                   |                           |                    |                                   |                           |                    |
| Highest CI               | 142 ± 10                          | 146 ± 5                   | 151 ± 9            | 38 ± 1*                           | 35 ± 2                    | 36 ± 1             |
| Lowest CI                | 140 ± 12                          | 141 ± 10                  | 143 ± 14           | 41 ± 2*                           | 39 ± 1                    | 43 ± 2             |
| PaCO <sub>2</sub> (mmHg) |                                   |                           |                    |                                   |                           |                    |
| Highest CI               | 34 ± 1                            | 34 ± 1                    | 36 ± 1             | 33 ± 1                            | 33 ± 1                    | 35 ± 1             |
| Lowest CI                | 29 ± 1                            | 30 ± 2                    | 30 ± 2             | 28 ± 1                            | 30 ± 1                    | 29 ± 2             |
| PvO <sub>2</sub> (mmHg)  |                                   |                           |                    |                                   |                           |                    |
| Highest CI               | 55 ± 2                            | 57 ± 1                    | 55 ± 1             | 31 ± 2*                           | 28 ± 1                    | 28 ± 1             |
| Lowest CI                | 33 ± 2                            | 36 ± 3                    | 35 ± 1             | 24 ± 1*                           | 24 ± 2                    | 21 ± 1             |

Values are expressed as mean ± SEM. Second and fourth columns are compared to the first. Third column is compared to the second. Fifth column is compared to the fourth. Sixth column is compared to

the fifth.

\* Significance of changes ( $P < 0.05$ ).

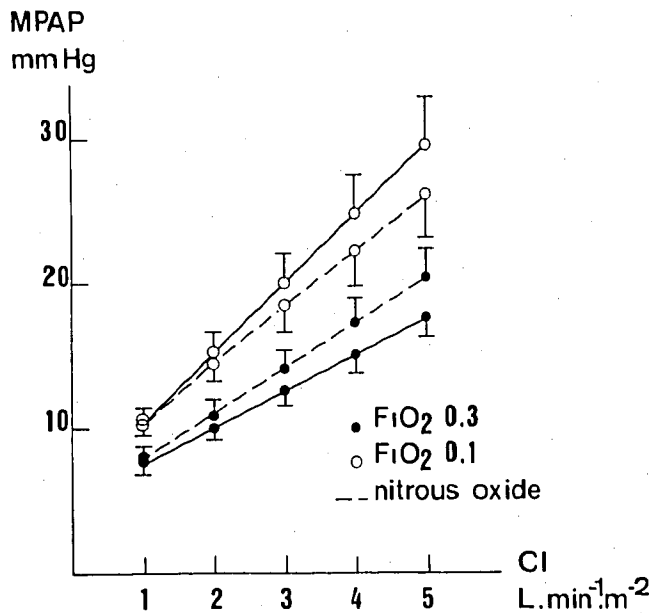

FIG. 1. Composite MPAP (mean  $\pm$  SEM)/CI plots for seven dogs ("responders") during normoxic and hypoxic conditions before and after 70% nitrous oxide.

### Discussion

In the present study, MPAP/CI plots were characterized in intact dogs anesthetized with pentobarbital, par-

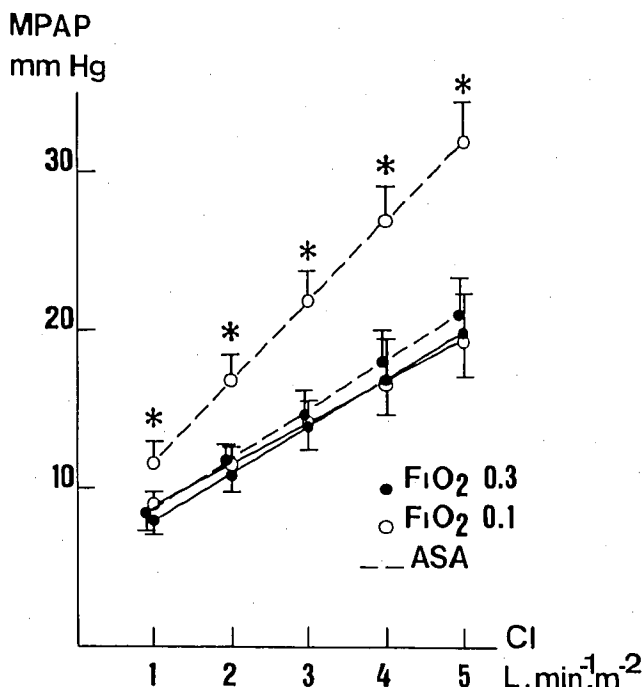

FIG. 2. Composite MPAP (mean  $\pm$  SEM)/CI plots for six dogs with a weak pressor response to hypoxia ("nonresponders") during normoxic and hypoxic conditions before and after acetylsalicylic acid (ASA) 1 g iv. \* $P < 0.05$   $FiO_2$  0.1 (with drug) versus  $FiO_2$  0.1 (without drug).

alyzed, and ventilated. Nitrous oxide in this experimental preparation partially inhibited HPV in the animals with a naturally occurring hypoxic pulmonary pressor response. In the animals with a restored hypoxic pulmonary pressor response after cyclooxygenase inhibition by ASA, nitrous oxide did not affect HPV, and increased pulmonary vascular tone in a non  $FiO_2$ -dependent manner.

Pulmonary vascular tone in intact animals and in humans commonly is evaluated by PVR calculated as MPAP minus PCWP (assumed equal to left atrial pressure) divided by cardiac output. This approach is misleading in many clinical and experimental circumstances.<sup>12-14</sup> In isolated lungs, the MPAP/flow relationship is rectilinear over a physiologic range of flows, but becomes curvilinear when flow is very low with a convexity to the pressure axis.<sup>13,20</sup> The extrapolation of the linear part of such curves has a positive pressure intercept corresponding to the closing pressure of the pulmonary vessels.<sup>13,20</sup> In normoxic recumbant intact conscious dogs<sup>14</sup> and in humans,<sup>21</sup> the MPAP/cardiac output plots are linear and the extrapolation of MPAP-PCWP/cardiac output plots passes through the origin, suggesting that closing pressure is exceeded by left atrial pressure as assessed by PCWP.<sup>20</sup> Hypoxia, a variety of diseases, and pharmacologic interventions are capable of affecting the slopes and the pressure intercepts of PAP/flow relationships.<sup>12-14,21</sup> When closing pressure is greater than PCWP and flow varies, the discrimination between active and passive (or flow-dependent) changes in PAP cannot be obtained by single PVR calculations. A correct appreciation of pulmonary hemodynamics then obviously requires measurements of pulmonary vascular pressures at several levels of flow.<sup>12-14</sup>

The MPAP/CI plots in our dogs were rectilinear in all experimental conditions, in keeping with studies on isolated lungs<sup>13,20</sup> and on intact conscious<sup>14</sup> or pentobarbital-anesthetized<sup>17,22</sup> dogs. Individual pressor responses to hypoxia consisted of variable increases in MPAP that were greatest at the highest CI studied, in agreement with reports of increased slopes and/or pressure intercepts of MPAP/flow plots in isolated lungs<sup>23</sup> and in intact conscious<sup>14</sup> or anesthetized<sup>17,22</sup> dogs. The magnitude of the hypoxia-induced increases in MPAP was comparable to reported observations in intact conscious dogs.<sup>14</sup>

Repetition of hypoxic exposures has been shown either to enhance<sup>24,25</sup> or not to affect<sup>26,27</sup> HPV. We have previously shown that, in our experimental preparation, a sequence of alternated normoxic ( $FiO_2$  0.4) and hypoxic ( $FiO_2$  0.1) MPAP/CI plots is reproducible up to two times without change in MPAP at each level of flow.<sup>22</sup> Explanations for reported initial blunting of HPV with subsequent recovery may be a transient re-

lease of vasodilating prostaglandins by surgical trauma to the lungs<sup>26,28</sup> or by small amounts of circulating endotoxin from nonsterile catheterization.<sup>28</sup> We also previously showed that, in our experimental preparation, no decay of the hypoxic pressor response occurred during 25–30-min periods needed for the construction of five-point MPAP/CI plots.<sup>17</sup>

The use of an *in vivo*-intact animal model allows the expression of many potential control mechanisms that contribute to the regulation of the pulmonary circulation. Changes in pH,<sup>29</sup> mixed venous  $P_{O_2}$ ,<sup>30</sup> neurohumoral activity,<sup>31</sup> and activation of the baroreflex<sup>32</sup> could have influenced pulmonary vascular tone along with the manipulations of blood flow. Therefore, MPAP/CI plots probably represent an integrated response of the intact pulmonary vasculature to a variety of vasoactive stimuli, rather than truly passive pressure/flow relationships.<sup>31</sup> The lungs of our dogs probably were predominantly in zone III before the stepwise inflations of the inferior vena cava balloon which progressively induced an increased proportion of zone II. Left atrial pressure was not kept constant, and, also, would not correctly be assessed by PCWP determinations at all levels of flow.<sup>14,33</sup> These methodological limitations inherent to the experimental model led us to analyze the changes in MPAP (rather than MPAP-PCWP) at the different levels of flow instead of comparing slopes (taken as incremental resistances) and extrapolated pressure intercepts (taken as averaged critical closing pressures) of the MPAP/CI lines.

In the present experiment, pulmonary vascular pressures were referenced to atmospheric pressure, without taking into account possible drug- or model-induced intrathoracic pressure changes. However, both hypoxia and generation of pressure/flow plots by inferior vena cava constriction have been shown not to affect pleural pressure as measured by the esophageal-balloon technique in conscious dogs.<sup>14</sup> Moreover, it seems reasonable to consider that only very small changes in intrathoracic pressure would be expected after acetylsalicylic acid or nitrous oxide administration in our anesthetized paralyzed and ventilated intact dogs.

The hypoxic pressor response is naturally absent in a certain proportion of humans,<sup>1</sup> sheep,<sup>15</sup> and dogs.<sup>16,17</sup> Administration of drugs that inhibit cyclooxygenase restores HPV in these "nonresponders."<sup>15–17</sup> In the present study, the remarkable difference between responders and non-responders supports the hypothesis that pulmonary vascular reactivity to hypoxia may be regulated by balanced actions of vasoconstricting leukotrienes and vasodilating prostaglandins.<sup>15–17</sup>

Nitrous oxide has little effect on normoxic pulmonary vascular tone in anesthetized dogs or in isolated cat lungs,<sup>4,34–36</sup> but has recently been shown to increase

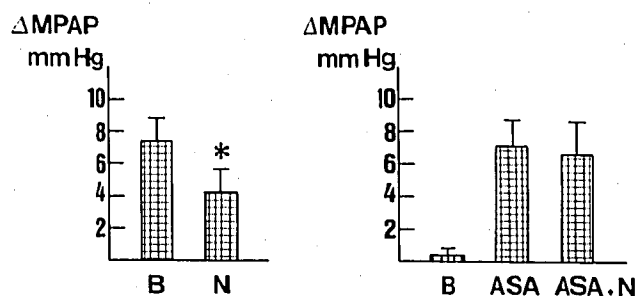

FIG. 3. Mean  $\pm$  SEM  $\Delta$ MPAP (MPAP at  $FI_{O_2}$  0.1–MPAP at  $FI_{O_2}$  0.3) for a normalized CI of  $3 \text{ l} \cdot \text{min}^{-1} \cdot \text{m}^{-2}$  in seven dogs ("responders") before nitrous oxide (B) and after nitrous oxide (N), and in six dogs ("nonresponders") before nitrous oxide (B), after acetylsalicylic acid (ASA), and after nitrous oxide (N).  $P < 0.05$  N versus B (left panel).

PVR in awake newborn lambs.<sup>11</sup> Conflicting data have been reported regarding the pulmonary hemodynamic effects of nitrous oxide in humans.<sup>37–41</sup> Some of this variability may be due to the different combinations with other anesthetics and to the presence or absence of preexisting pulmonary hypertension.<sup>38</sup> On the other hand, with the exception of one study,<sup>10</sup> nitrous oxide has consistently been reported to inhibit HPV,<sup>3–9</sup> and this was also observed in the present experiments on dogs with a hypoxic pressor response ("responders").

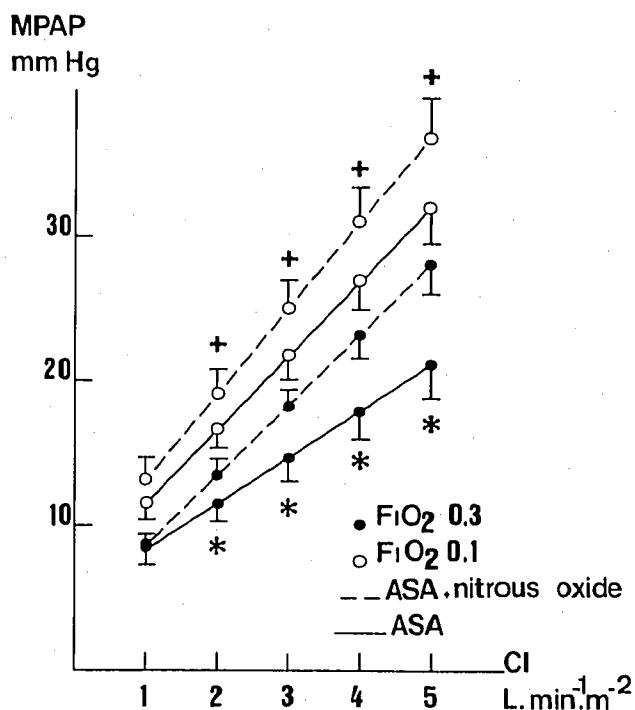

FIG. 4. Composite MPAP (mean  $\pm$  SEM)/CI plots for six dogs with a restored pressor response to hypoxia ("nonresponders") given acetylsalicylic acid (ASA) 1 g iv during normoxic and hypoxic conditions before and after 70% nitrous oxide. \* $P < 0.05$   $FI_{O_2}$  0.3 (without nitrous oxide) versus  $FI_{O_2}$  0.3 (with nitrous oxide) \* $P < 0.05$   $FI_{O_2}$  0.1 (with nitrous oxide) versus  $FI_{O_2}$  0.1 (without nitrous oxide).

Vasoconstricting effects of nitrous oxide can be reversed by the administration of the  $\alpha$ -blocker phentolamine,<sup>41</sup> suggesting that the sympathetic nervous system may be involved in the hemodynamic effects of this agent. Nitrous oxide has been shown to increase sympathetic outflow from the brain,<sup>42</sup> to inhibit removal of norepinephrine by the lung,<sup>43</sup> and to increase norepinephrine release by nerve endings in a dog pulmonary artery preparation.<sup>44</sup> Murray *et al.*<sup>31</sup> reported that neural antagonists regulate pulmonary vascular pressure/flow relationships in conscious dogs, and that the net effect of the autonomic nervous system during normoxia appears to be pulmonary vasodilation ( $\beta$ effect). The slight but non-significant changes in pulmonary vascular tone induced by nitrous oxide in the "responders" (vasoconstriction during normoxia and vasodilation during hypoxia) could be due to the increase in circulating and locally released catecholamines. Pulmonary vasoactive properties of catecholamines, indeed, are known to be dependent on the preexisting level of vascular tone.<sup>22,45,46</sup>

Inhaled anesthetics have been reported to stimulate the release of arachidonic acid from cell membranes.<sup>18</sup> In our "nonresponders" treated with ASA, enhanced hypoxic pulmonary vascular tone by nitrous oxide could be explained by an increased generation of vasoconstrictor leukotrienes from increased amounts of precursor available.

In conclusion, the pulmonary vascular effects of nitrous oxide are probably too slight to be of clinical relevance. Inhibition of HPV by nitrous oxide is probably not a mechanism of hypoxemia during anesthesia.

The authors gratefully acknowledge the technical assistance of Marie-Thérèse Gautier.

## References

1. Fishman AP: Hypoxia on the pulmonary circulation. How and where it acts. *Circ Res* 38:221-231, 1976
2. Benumof JL: One-lung ventilation and hypoxic pulmonary vasoconstriction. Implications for anesthetic management. *Anesth Analg* 64:821-833, 1985
3. Benumof JL, Wahrenbrock EA: Local effects of anesthetics on regional hypoxic pulmonary vasoconstriction. *ANESTHESIOLOGY* 43:525-532, 1975
4. Hurtig JB, Tait AR, Loh L, Sykes MK: Reduction of hypoxic pulmonary vasoconstriction by nitrous oxide administration in the isolated perfused cat lung. *Can Anaesth Soc J* 24:540-549, 1977
5. Mathers J, Benumof JL, Wahrenbrock EA: General anesthetics and regional hypoxic pulmonary vasoconstriction. *ANESTHESIOLOGY* 46:111-114, 1977
6. Bindslev L, Cannon D, Sykes MK: Effect of lignocaine and nitrous oxide on hypoxic pulmonary vasoconstriction in the dog constant-flow perfused left lower lobe preparation. *Br J Anaesth* 58:315-320, 1986
7. Bindslev L, Cannon D, Sykes MK: Reversal of nitrous oxide-induced depression of hypoxic pulmonary vasoconstriction by lignocaine hydrochloride during collapse and ventilation hypoxia of the left lower lobe. *Br J Anaesth* 58:451-456, 1986
8. Bjertnaes LJ: Hypoxia-induced vasoconstriction in isolated perfused lungs exposed to injectable or inhalation anesthetics. *Acta Anaesthesiol Scand* 21:133-147, 1977
9. Sykes MK, Hurtig JB, Tait AR, Chakrabarti MK: Reduction of hypoxic pulmonary vasoconstriction in the dog during administration of nitrous oxide. *Br J Anaesth* 49:301-307, 1977
10. Buckley MJ, McLaughlin JS, Fort L, Saigusa M, Morrow DH: Effects of anesthetic agents on pulmonary vascular resistance during hypoxia. *Surg Forum* 15:183-184, 1964
11. Eisele JH, Milstein JM, Goetzman BW: Pulmonary vascular responses to nitrous oxide in newborn lambs. *Anesth Analg* 65:62-64, 1986
12. McGregor M, Sniderman A: On pulmonary vascular resistance: The need for more precise definition. *Am J Cardiol* 55:217-221, 1985
13. Graham R, Skoog C, Macedo W, Carter J, Oppenheimer L, Rabson J, Goldberg HS: Dopamine, dobutamine, and phentolamine effects on pulmonary vascular mechanics. *J Appl Physiol* 54:1277-1283, 1983
14. Lodato RJ, Michael JR, Murray PA: Multipoint pulmonary vascular pressure-cardiac output plots in conscious dogs. *Am J Physiol* 249:H351-H357, 1985
15. Ahmed T, Oliver W, Wanner A: Variability of hypoxic pulmonary vasoconstriction in sheep. Role of prostaglandins. *Am Rev Respir Dis* 127:59-62, 1983
16. Hales CA, Rouse ET, Slate JL: Influence of aspirin and indomethacin on variability of alveolar hypoxic vasoconstriction. *J Appl Physiol* 45:33-39, 1978
17. Leeman M, Naeije R, Lejeune P, Mélot C: Influence of cyclooxygenase inhibition and of leukotriene receptor blockade on pulmonary vascular pressure/cardiac index relationships in hyperoxic and in hypoxic dogs. *Clin Sci* 72:717-724, 1987
18. Shayevitz JR, Traystman RJ, Adkinson NF, Sciuto AM, Gurtner GH: Inhalation anesthetics augment oxidant-induced pulmonary vasoconstriction: Evidence for a membrane effect. *ANESTHESIOLOGY* 63:624-632, 1985
19. Winer BJ: *Statistical Principles in Experimental Design*. New York, McGraw-Hill, 1971, pp 514-603
20. Shoukas AA: Pressure-flow and pressure-volume relations in the entire pulmonary vascular bed of the dog determined by two-port analysis. *Circ Res* 37:809-818, 1975
21. Even P, Duroux P, Ruff F, Cambarrera I, de Vernejoul P, Brouet G: The pressure-flow relationships of the pulmonary circulation in normal and in chronic obstructive pulmonary disease. Effects of muscular exercise. *Scand J Respir Dis* 77 (Suppl): 72-76, 1971
22. Lejeune P, Naeije R, Leeman M, Mélot C, Delcroix M: Effects of dopamine and dobutamine on hyperoxic and hypoxic pulmonary vascular tone in dogs. *Am Rev Respir Dis* 136:29-35, 1987
23. Rock P, Patterson A, Permutt S, Sylvester J: Nature and distribution of vascular resistance in hypoxic pig lung. *J Appl Physiol* 59:1891-1901, 1985
24. Benumof JL: Intermittent hypoxia increases lobar hypoxic pulmonary vasoconstriction. *ANESTHESIOLOGY* 58:399-404, 1983
25. Unger M, Atkins M, Briscoe WA, King TCK: Potentiation of pulmonary vasoconstrictor response with repeated intermittent hypoxia. *J Appl Physiol* 43:662-667, 1977
26. Chen L, Miller FL, Williams JJ, Alexander CM, Domino KB, Marshall C, Marshall BE: Hypoxic pulmonary vasoconstriction is not potentiated by repeated intermittent hypoxia in closed chest dogs. *ANESTHESIOLOGY* 63:608-610, 1985

27. Miller MA, Hales CA: Stability of alveolar hypoxic vasoconstriction with intermittent hypoxia. *J Appl Physiol* 49:846-850, 1980
28. Grover RJ: The fascination of the hypoxic lung. *ANESTHESIOLOGY* 63:580-582, 1985
29. Thilenius OG, Derenzo C: Effects of acutely induced changes in arterial pH on pulmonary vascular resistance during normoxia and hypoxia in awake dogs. *Clin Sci* 42:277-287, 1972
30. Hughes JD, Rubin LJ: Relation between mixed venous oxygen tension and pulmonary vascular tone during normoxic, hyperoxic and hypoxic ventilation in dogs. *Am J Cardiol* 54:1118-1123, 1984
31. Murray PA, Lodato RF, Michael JR: Neural antagonists modulate pulmonary vascular pressure-flow plots in conscious dogs. *J Appl Physiol* 60:1900-1907, 1986
32. Shoukas A, Brunner M, Frankle A, Greene A, Kallman C: Carotid sinus baroreceptor reflex control and the role of autoregulation in the systemic and pulmonary arterial pressure-flow relationships of the dog. *Circ Res* 54:674-682, 1984
33. Jasper AC, Soohoo SL, Goldberg HS: Relation of arterial wedge pressure to closing pressure in the pulmonary circulation. *Am Rev Respir Dis* 134:879-884, 1986
34. Sykes MK, Loh L, Seed RF, Kafer ER, Chakrabarti MK: The effect of inhalational anaesthetics on hypoxic pulmonary vasoconstriction and pulmonary vascular resistance in the perfused lungs of the dog and cat. *Br J Anaesth* 44:776-788, 1972
35. Dottori O, Häggendal E, Linder E, Nordström G, Seeman T: The haemodynamic effects of nitrous oxide anaesthesia on systemic and pulmonary circulation in dogs. *Acta Anaesthesiol Scand* 20:429-436, 1976
36. Loh L, Seed RF, Sykes MK: The cardiorespiratory effects of halothane, trichloroethylene and nitrous oxide in the dog. *Br J Anaesth* 45:125-130, 1973
37. Lunn JK, Stanley TH, Eisele J, Webster L, Woodward A: High dose fentanyl anesthesia for coronary artery surgery. Plasma fentanyl concentrations and influence of nitrous oxide on cardiovascular response. *Anesth Analg* 58:390-395, 1979
38. McCammon RL, Hilgenberg JC, Stoelting RK: Hemodynamic effects of diazepam and diazepam-nitrous oxide in patients with coronary artery disease. *ANESTHESIOLOGY* 59:438-441, 1980
39. Schulte-Sasse U, Hess W, Tarnow J: Pulmonary vascular responses to nitrous oxide in patients with normal and high pulmonary vascular resistance. *ANESTHESIOLOGY* 57:9-13, 1982
40. Hilgenberg JC, McCammon RL, Stoelting RK: Pulmonary and systemic vascular responses to nitrous oxide in patients with mitral stenosis and pulmonary hypertension. *Anesth Analg* 59:323-326, 1980
41. Lappas DG, Buckley MJ, Laver MB, Daggett WM, Lowenstein E: Left ventricular performance and pulmonary circulation following addition of nitrous oxide to morphine during coronary-artery surgery. *ANESTHESIOLOGY* 43:61-69, 1975
42. Fukunaga AF, Epstein RM: Sympathetic excitation during nitrous oxide-halothane anesthesia in the cat. *ANESTHESIOLOGY* 39:23-26, 1973
43. Naito H, Gillis CN: Effects of halothane and nitrous oxide on removal of norepinephrine from the pulmonary circulation. *ANESTHESIOLOGY* 39:575-580, 1973
44. Rorie DK, Tyce GM, Sill JC: Increased norepinephrine release from dog pulmonary artery caused by nitrous oxide. *Anesth Analg* 65:560-564, 1986
45. Hyman AL, Nandiwada P, Knight DS, Kadowitz PJ: Pulmonary vasodilator responses to catecholamines and sympathetic nerve stimulation in the cat. Evidence that vascular  $\beta$ -2 adrenoreceptors are innervated. *Circ Res* 48:407-415, 1981
46. Hyman AL, Kadowitz PJ: Enhancement of  $\alpha$  and  $\beta$ -adrenoceptor responses by elevations in vascular tone in pulmonary circulation. *Am J Physiol* 250:H1109-H1116, 1986
